# Supplementary material for: Oral Sensitivity to Flowability and Food Neophobia Drive Food Preferences and Choice
Source: MDPI journal article supplement (doi:10.3390/foods10051024), 2021-05-08
Supplement: s1 [file s1]

# Supplementary Material

**Table S1.** Ranking test results: multiple pairwise comparisons using Nemenyi's procedure/ Two-tailed test.

| Solid concentration<br>(% <i>w/v</i> ) | Sum of ranks | Mean of ranks | Groups <sup>†</sup> |   |   |   |   |
|----------------------------------------|--------------|---------------|---------------------|---|---|---|---|
| 54                                     | 39           | 1.219         | A                   |   |   |   |   |
| 48                                     | 63           | 1.969         | A                   |   |   |   |   |
| 43*                                    | 94           | 2.938         | A                   | B |   |   |   |
| 39*                                    | 128          | 4.000         |                     | B | C |   |   |
| 36*                                    | 163          | 5.094         |                     |   | C | D |   |
| 33*                                    | 191          | 5.969         |                     |   |   | D | E |
| 31*                                    | 224          | 7.000         |                     |   |   |   | E |
| 29                                     | 250          | 7.813         |                     |   |   |   | E |

†  $p < 0.0001$ ; \*Samples selected for the consumer test.
